# Supplementary material for: Effect of Flavorization on Virgin Olive Oil Oxidation and Volatile Profile
Source: MDPI journal article supplement (doi:10.3390/antiox12020242), 2023-01-21
Supplement: s1 [file s1]

## Supplementary Information:

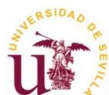

Departamento Química Analítica

### Odour sheet of sensory attributes of virgin and flavored olive oils

Name of taster:

Date:

Sample code:

1. Olive fruit (green)
2. Olive fruit (ripe)
3. Other ripe fruits
4. Apple
5. Green
6. Tomato
7. Sweet
8. Artichoke
9. Basil
10. Rosemary
11. Other (specify):
12. Rancid
13. Other sensory defects (specify):

Further comments:

**Figure S1.** Profile sheet employed for the evaluation of the olive oil samples (VOO, ROO, BOO).

**Table S1.** Evolution of the main physico-chemical parameters in the three types of olive oils (VOO, ROO, BOO).

| Time<br>(month) | Acidity Index<br>(% m/m expressed<br>in oleic acid) |      |      | Peroxide Value<br>(meq O <sub>2</sub> / Kg oil) |       |       | K232  |       |       | K270  |       |       |
|-----------------|-----------------------------------------------------|------|------|-------------------------------------------------|-------|-------|-------|-------|-------|-------|-------|-------|
|                 | VOO                                                 | ROO  | BOO  | VOO                                             | ROO   | BOO   | VOO   | ROO   | BOO   | VOO   | ROO   | BOO   |
| 1               | 0.48                                                | 0.65 | 0.63 | 7.41                                            | 13.00 | 10.25 | 1.578 | 1.778 | 1.721 | 0.206 | 0.183 | 0.162 |
| 2               | 0.50                                                | 0.69 | 0.66 | 5.73                                            | 10.00 | 8.37  | 1.667 | 1.924 | 1.780 | 0.218 | 0.194 | 0.173 |
| 3               | 0.65                                                | 0.71 | 0.66 | 5.71                                            | 9.20  | 5.99  | 1.711 | 2.024 | 1.792 | 0.214 | 0.293 | 0.184 |
| 4               | 0.70                                                | 0.78 | 0.79 | 5.75                                            | 4.50  | 6.22  | 1.693 | 1.950 | 1.680 | 0.210 | 0.278 | 0.207 |
| 5               | 0.73                                                | 0.87 | 0.83 | 4.2                                             | 5.81  | 8.00  | 1.679 | 1.900 | 1.610 | 0.216 | 0.269 | 0.216 |
| 6               | 0.78                                                | 0.89 | 0.84 | 6.72                                            | 8.98  | 4.47  | 1.650 | 2.00  | 1.590 | 0.210 | 0.290 | 0.210 |

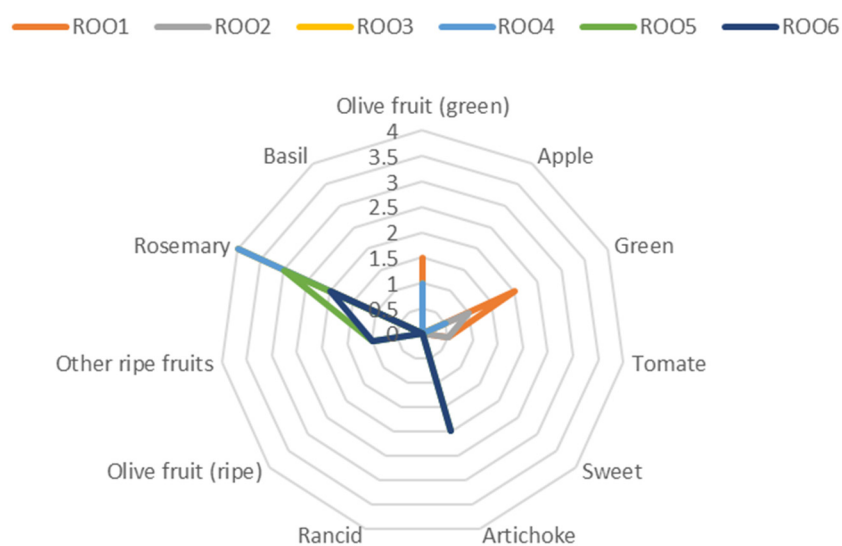

**Figure S2.** Spider chart evolution of the sensory attributes evaluated during six month stored of rosemary olive oil.

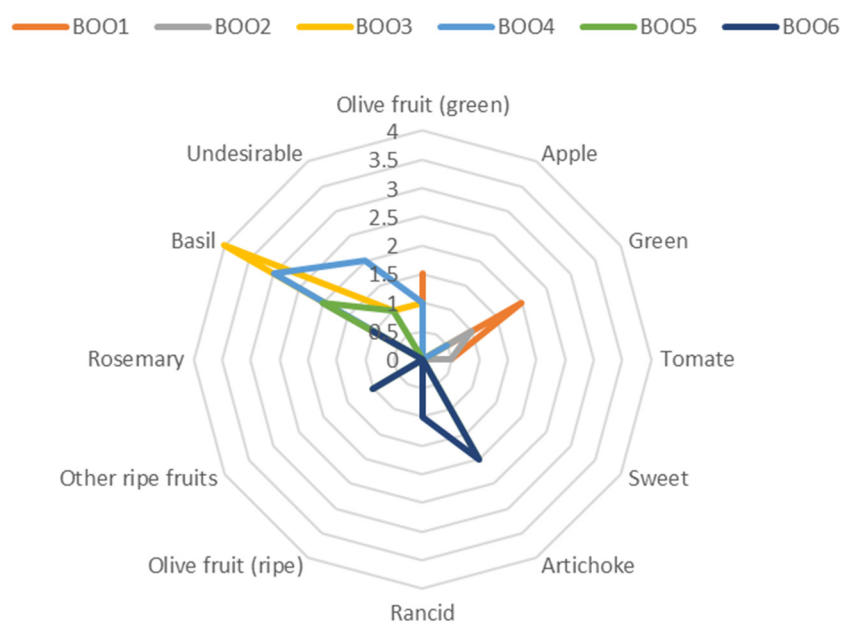

**Figure S3.** Spider chart evolution of the sensory attributes evaluated during six month stored of basil olive oil.

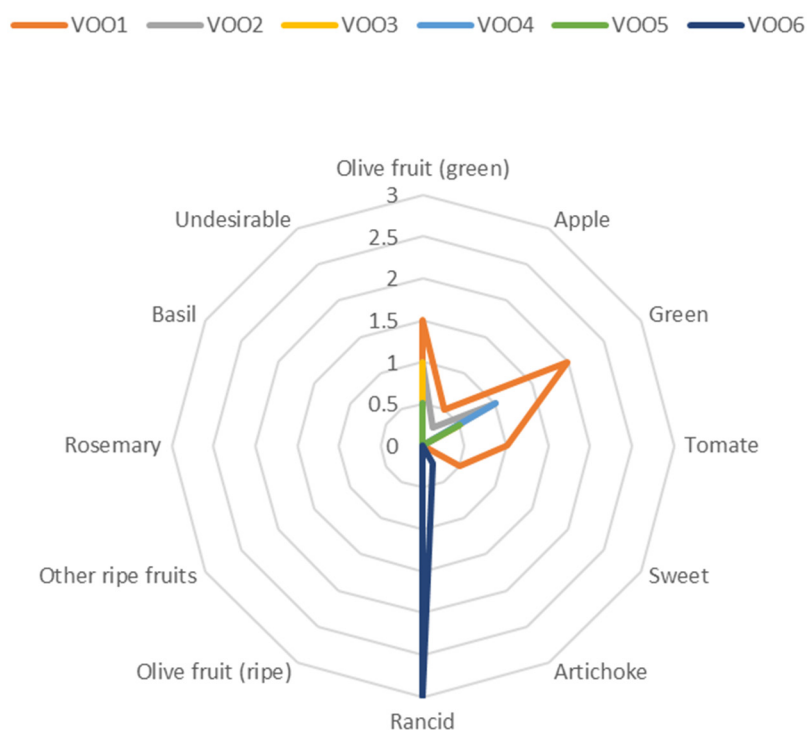

**Figure S4.** Spider chart evolution of the sensory attributes evaluated during six month stored of virgin olive oil.
